# Supplementary material for: Strain-induced excellent photocatalytic performance in Z-scheme BlueP/γ-SnS heterostructures for water splitting
Source: Royal Society of Chemistry journal article supplement (doi:10.1039/d3cp06004g), 2024-01-01
Supplement: d3cp06004g1.pdf [file d3cp06004g1.pdf]

*Electronic Supplement Information for*

**Strain-induced excellent photocatalytic performance  
in Z-scheme BlueP/ $\gamma$ -SnS heterostructures for water  
splitting**

Quan Li<sup>a</sup>, Jiabao Wang<sup>a</sup>, Hao Hang<sup>a</sup>, Guangting Zhao<sup>a</sup>, Ling-Ling Wang<sup>b</sup> and Xiaojun  
Zhu<sup>\*c</sup>

<sup>a</sup> School of Energy and Mechanical Engineering, Jiangxi University of Science and  
Technology, Nanchang 330013, China.

<sup>b</sup> School of Physics and Electronics, Hunan University, Changsha 410082, China.

<sup>c</sup> School of Software Engineering, Jiangxi University of Science and Technology,  
Nanchang 330013, China.

---

\* Corresponding author.

E-mail address: zhuxiaojun@jxust.edu.cn.

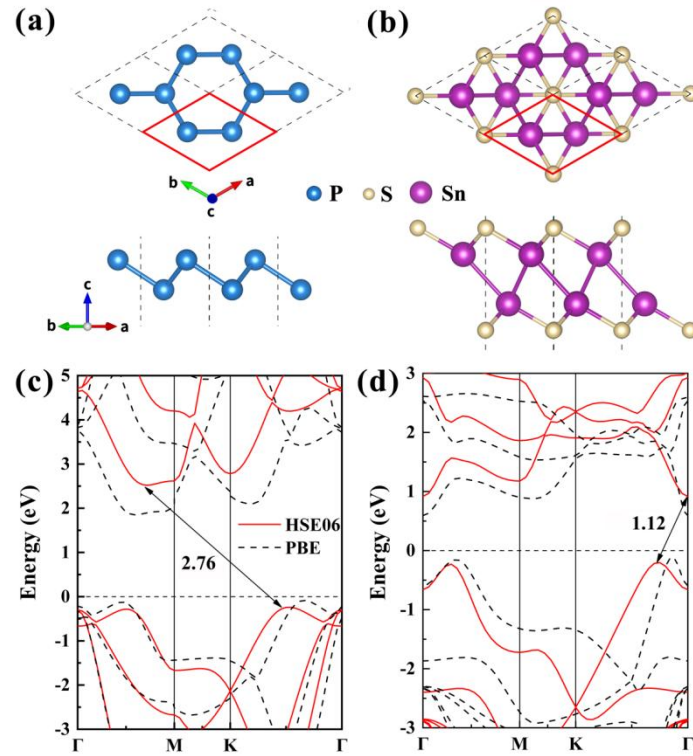

**Figure S1** Top (upper) and side (downside) views of (a) BlueP and (b)  $\gamma$ -SnS monolayers. Blue, brownish yellow and purple balls represent P, S and Sn atoms, respectively. Band structure of (c) BlueP and (d)  $\gamma$ -SnS monolayers calculated with PBE and HSE06 functionals. The Fermi level was set to zero.

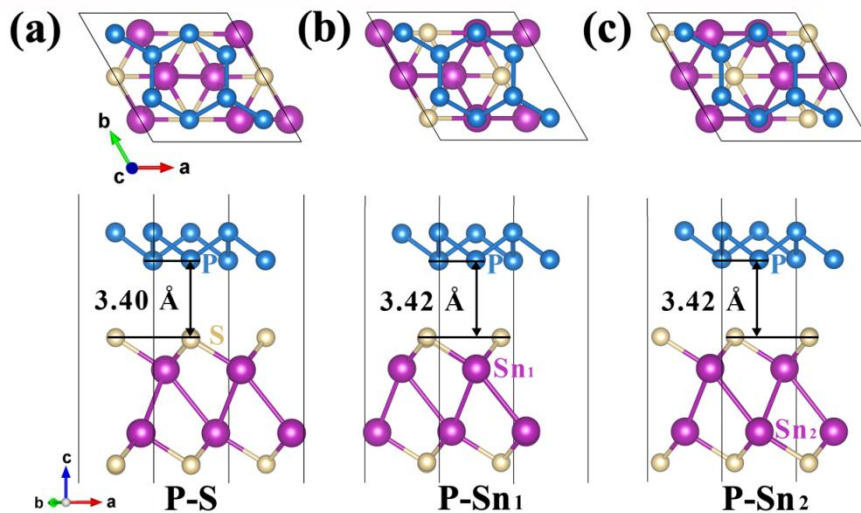

**Figure S2** Top (upper) and side (downside) views of the three stacking patterns with different atom-alignment types for BlueP/ $\gamma$ -SnS heterobilayers. The interlayer distance is given in the corresponding configuration.

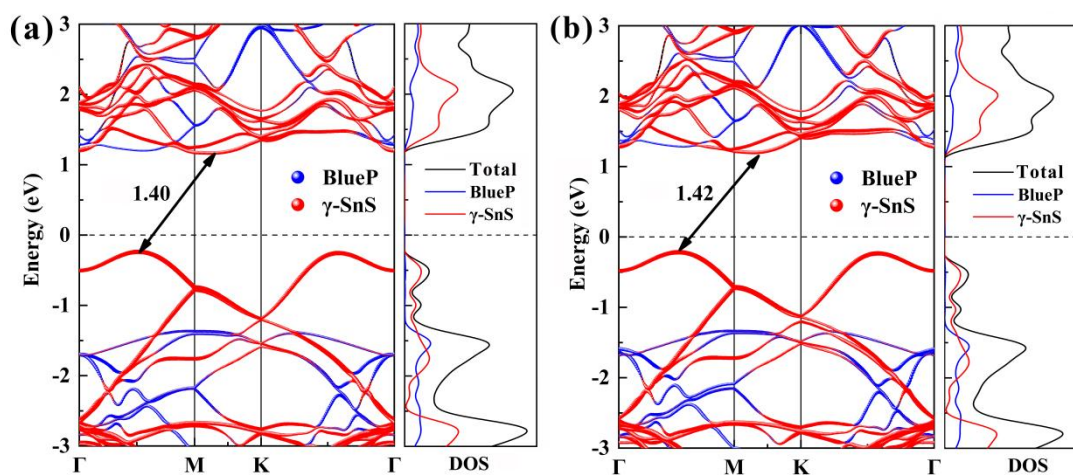

**Figure S3** Projected band structures (left) and PDOS (right) of (a) P-Sn<sub>1</sub> and (b) P-Sn<sub>2</sub>. The blue and red patterns in band structures denote the weight of BlueP and  $\gamma$ -SnS monolayers, respectively. The black, blue, and red lines in the DOS represent the density of states for the heterojunction, BlueP monolayer and  $\gamma$ -SnS monolayer, respectively. The dashed lines represent the Fermi level.

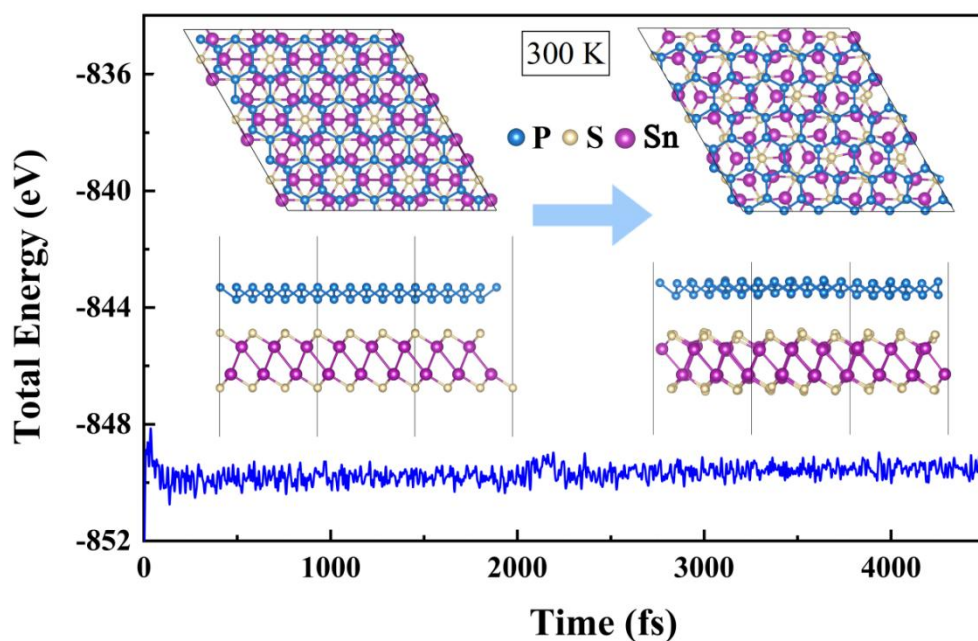

**Figure S4** Total potential energy fluctuation with the AIMD simulation time at 300 K for the BlueP/ $\gamma$ -SnS heterobilayer. The insets show the initial and final structures in AIMD simulation, respectively.

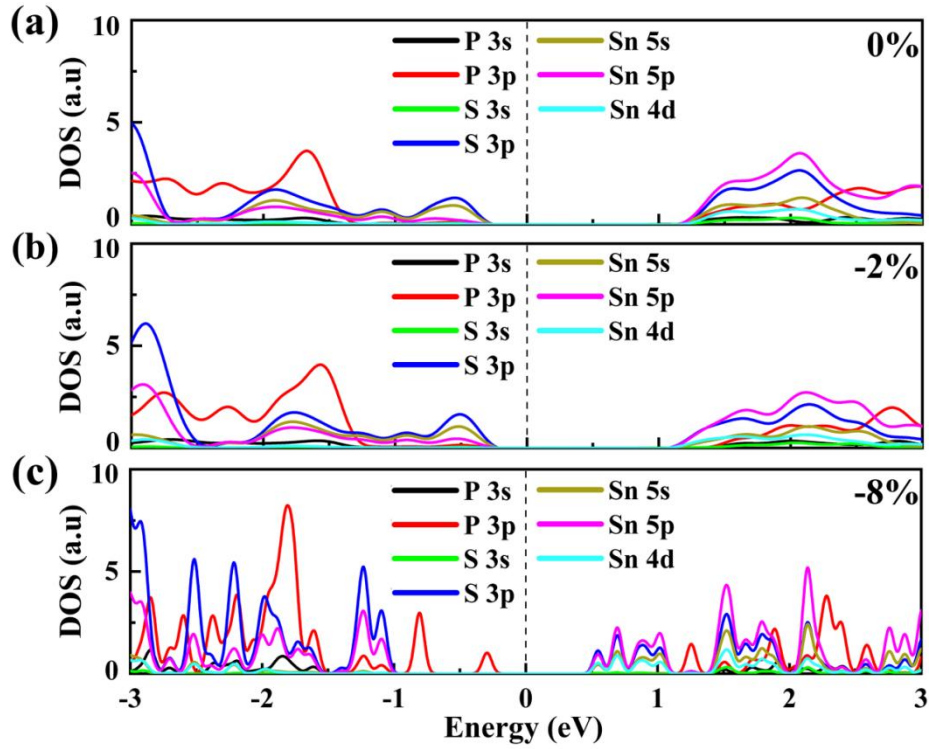

**Figure S5** Atom-resolved density of states (DOS) of the BlueP/ $\gamma$ -SnS heterojunction under (a) 0%, (b) -2%, and (c) -8% strains.

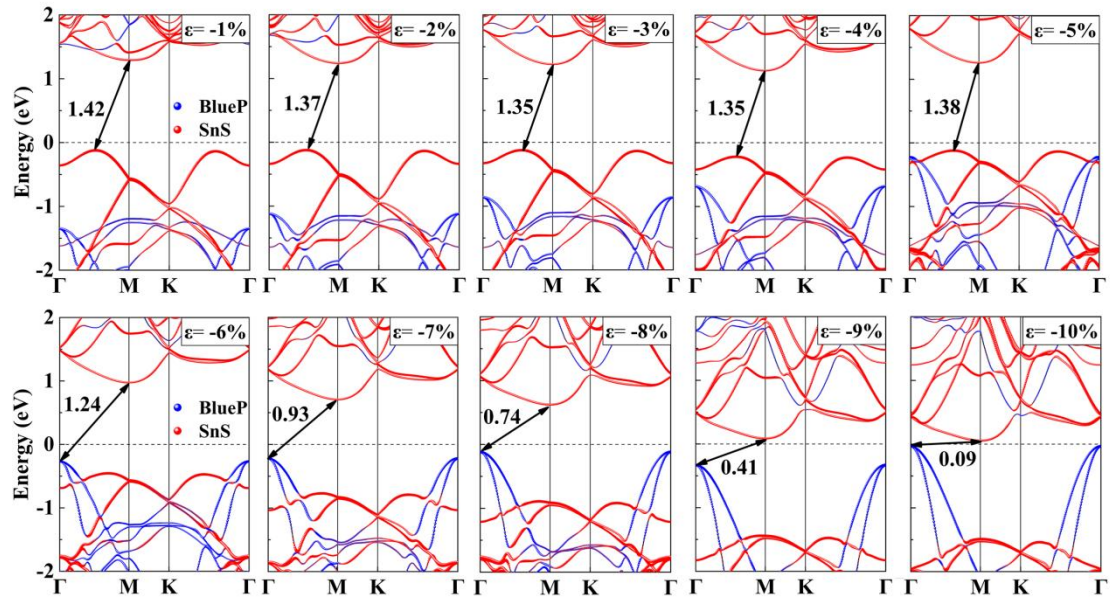

**Figure S6** The projected band structures of BlueP/ $\gamma$ -SnS bilayer under different compressive strains ( $-10\% \leq \varepsilon \leq -1\%$ ). The curves highlighted by blue and red spheres represent the BlueP and  $\gamma$ -SnS components, respectively. The Fermi level was set to zero.

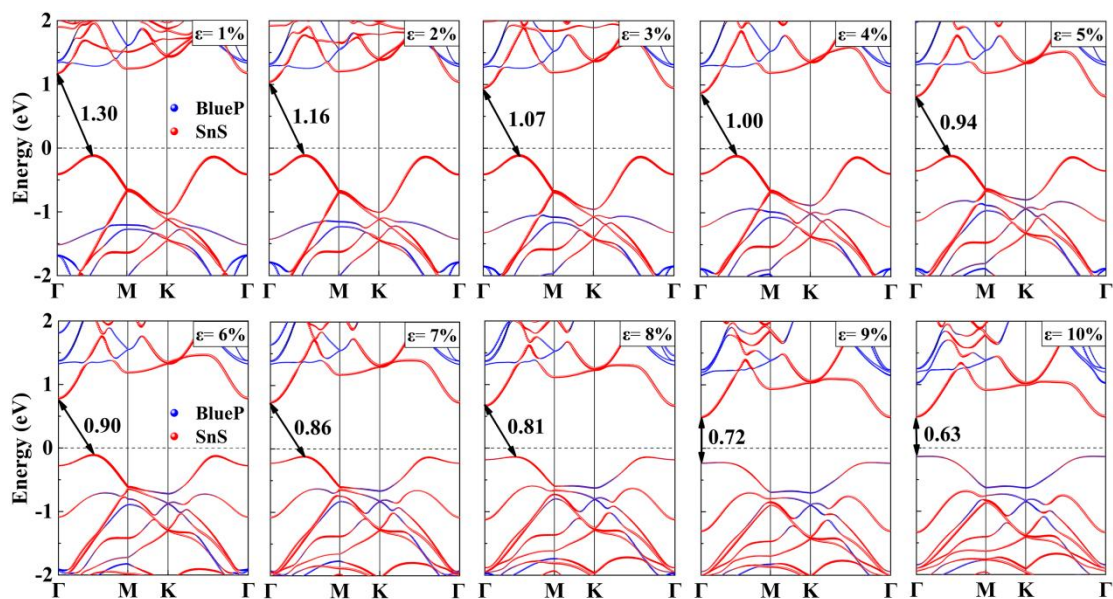

**Figure S7** The projected band structures of BlueP/ $\gamma$ -SnS heterobilayer under different tensile strains ( $1\% \leq \varepsilon \leq 10\%$ ). The curves highlighted by blue and red spheres represent the BlueP and  $\gamma$ -SnS components, respectively. The Fermi level was set to zero.

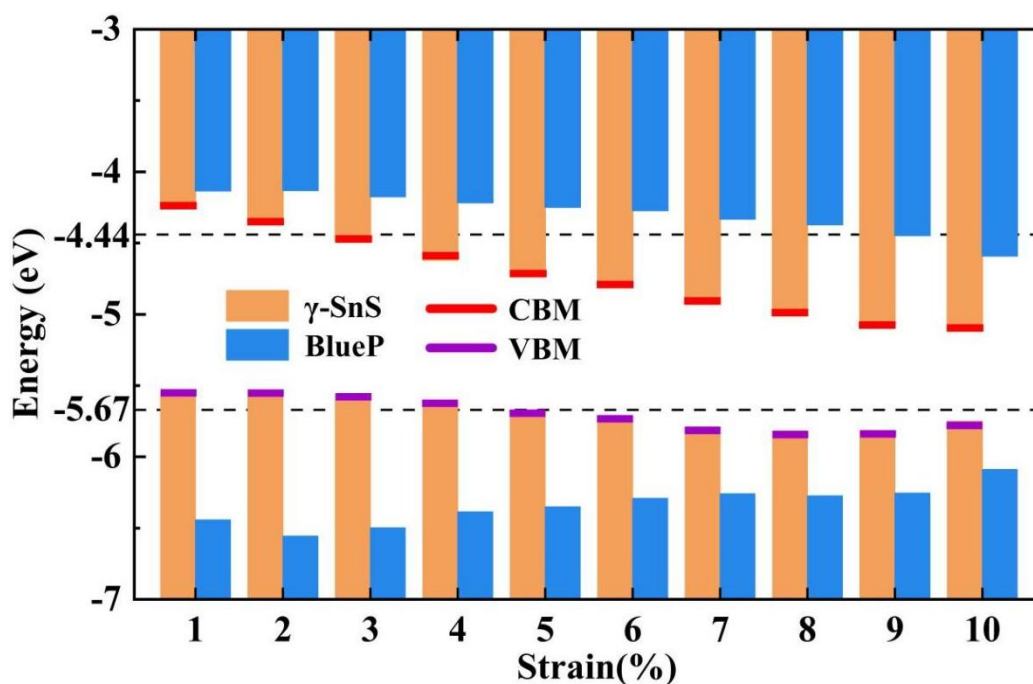

**Figure S8** The band edge positions of BlueP and  $\gamma$ -SnS monolayers in BlueP/ $\gamma$ -SnS bilayer under various tensile strains ( $1\% \leq \varepsilon \leq 10\%$ ), with respect to water redox potentials at pH=0. The blue and orange columns stand for the BlueP and  $\gamma$ -SnS, respectively.

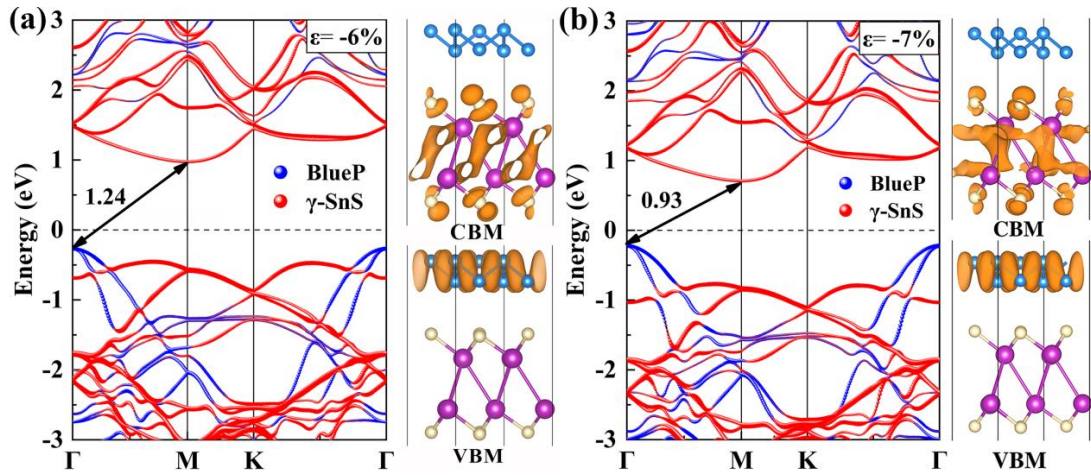

**Figure S9** The projected band structures and the partial charge density (VBM and CBM) of the BlueP/ $\gamma$ -SnS heterojunction under (a) -6% and (b) -7% strains.

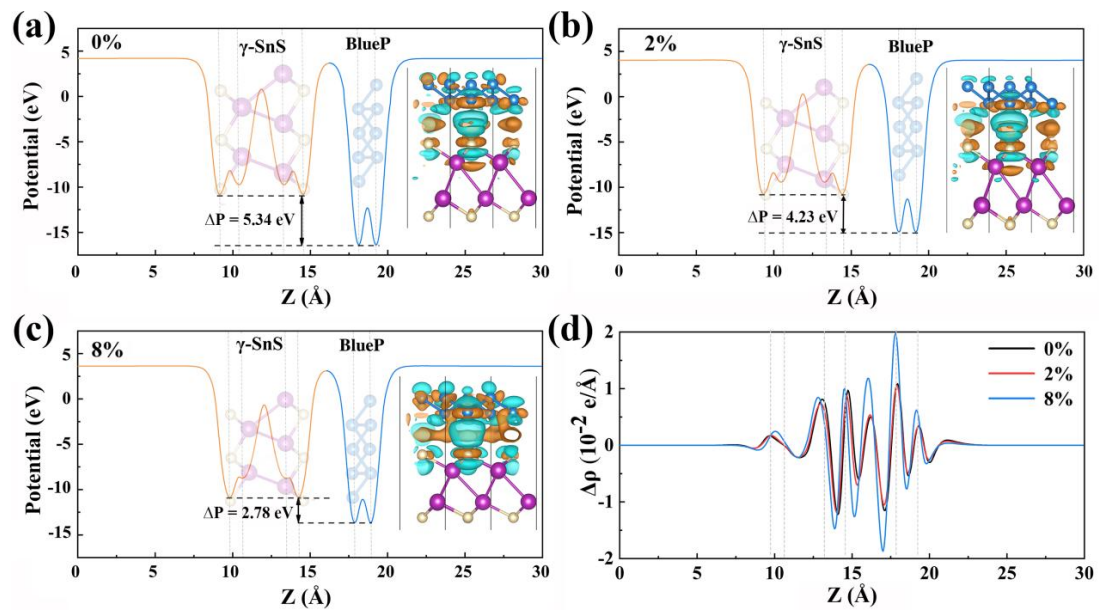

**Figure S10** , The electrostatic potential and three-dimensional charge density difference along the  $z$ -direction for the BlueP/ $\gamma$ -SnS heterojunction at (a) 0%, (b) 2%, and (c) 8% strains. The contour values were set at  $2 \times 10^{-4} \text{ e}/\text{\AA}^3$ . The orange and blue contours respectively denote the accumulation and depletion of electrons in space. (d) The planar-averaged charge density difference of the BlueP/ $\gamma$ -SnS heterojunction under 0%, 2%, and 8% strains.

**Table S1** Different stacking modes, lattice constants (a and b), interface area (Area), interface binding energy ( $E_b$ ), interlayer distance (Distance), and band gap of BlueP/ $\gamma$ -SnS heterostructures.

| System            | Lattice constant ( $\text{\AA}$ ) |      | Area ( $\text{\AA}^2$ ) | $E_b$ (meV/ $\text{\AA}^2$ ) | Distance ( $\text{\AA}$ ) | Band gap (eV) |       |
|-------------------|-----------------------------------|------|-------------------------|------------------------------|---------------------------|---------------|-------|
|                   | a                                 | b    |                         |                              |                           | PBE           | HSE06 |
| P-S               | 6.63                              | 6.63 | 38.03                   | -8.92                        | 3.40                      | 0.90          | 1.41  |
| P-Sn <sub>1</sub> | 6.63                              | 6.63 | 38.06                   | -8.89                        | 3.42                      | 0.89          | 1.40  |
| P-Sn <sub>2</sub> | 6.63                              | 6.61 | 37.95                   | -8.82                        | 3.42                      | 0.94          | 1.42  |

**Table S2** Reduced effective masses ( $m$ ), 2D elastic moduli ( $C$ ), deformation potential constant ( $E$ ) and carrier mobilities ( $\mu$ ) of BlueP and  $\gamma$ -SnS monolayers along different directions.

| Carrier type | System        | $m_x$     | $m_y$     | $C_x$  | $C_y$  | $E_x$ | $E_y$ | $\mu_x$                                       | $\mu_y$                                       |
|--------------|---------------|-----------|-----------|--------|--------|-------|-------|-----------------------------------------------|-----------------------------------------------|
|              |               | ( $m_0$ ) | ( $m_0$ ) | (N/m)  | (N/m)  | (eV)  | (eV)  | ( $\text{cm}^2 \text{V}^{-1} \text{S}^{-1}$ ) | ( $\text{cm}^2 \text{V}^{-1} \text{S}^{-1}$ ) |
| Electron     | BlueP         | 0.92      | 1.05      | 78.15  | 78.26  | 2.26  | 7.42  | 360.83                                        | 29.40                                         |
|              | $\gamma$ -SnS | 0.21      | 0.21      | 129.92 | 128.32 | -6.42 | -5.96 | 1546.88                                       | 1725.86                                       |
| Hole         | BlueP         | 0.89      | 0.80      | 78.15  | 78.26  | 2.00  | 1.40  | 548.67                                        | 1246.55                                       |
|              | $\gamma$ -SnS | 0.31      | 0.31      | 129.92 | 128.32 | -3.26 | -3.73 | 2704.89                                       | 2144.52                                       |
